# Supplementary material for: Association of human papillomavirus 16 and 18 with ovarian cancer risk: Insights from a meta‑analysis
Source: PubMed Central journal article supplement — Oncol Lett. 2024 Sep 19;28(6):556. doi: 10.3892/ol.2024.14689 (PMC11443309; doi:10.3892/ol.2024.14689), 2024-09-19
Supplement: Supplementary_Data1.pdf [file Supplementary_Data1.pdf]

Figure S1. Forest plot. Subgroup analysis of human papillomavirus prevalence (any genotype) in ovarian cancer by region (E vs. As). As, Asia; E, Europe.

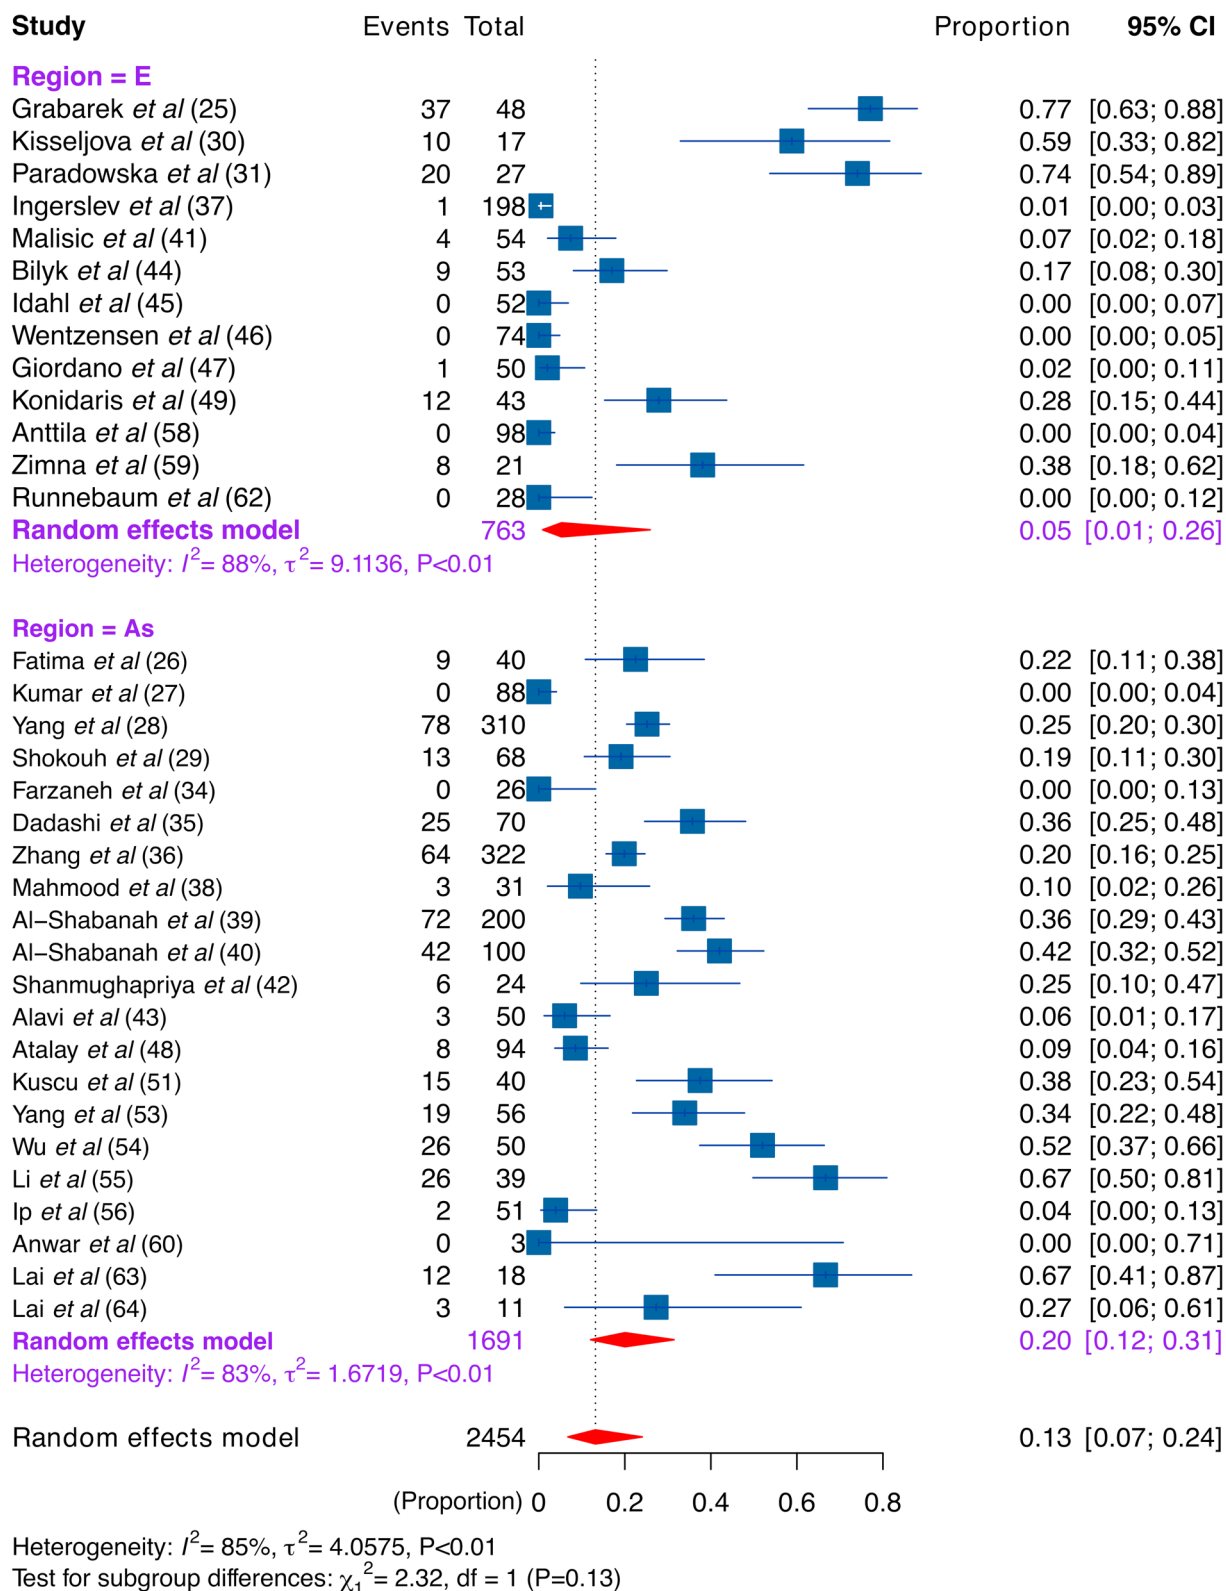

Figure S2. Forest plot. Subgroup analysis of HPV 16/18 prevalence in ovarian cancer by region (E vs. As). As, Asia; E, Europe.

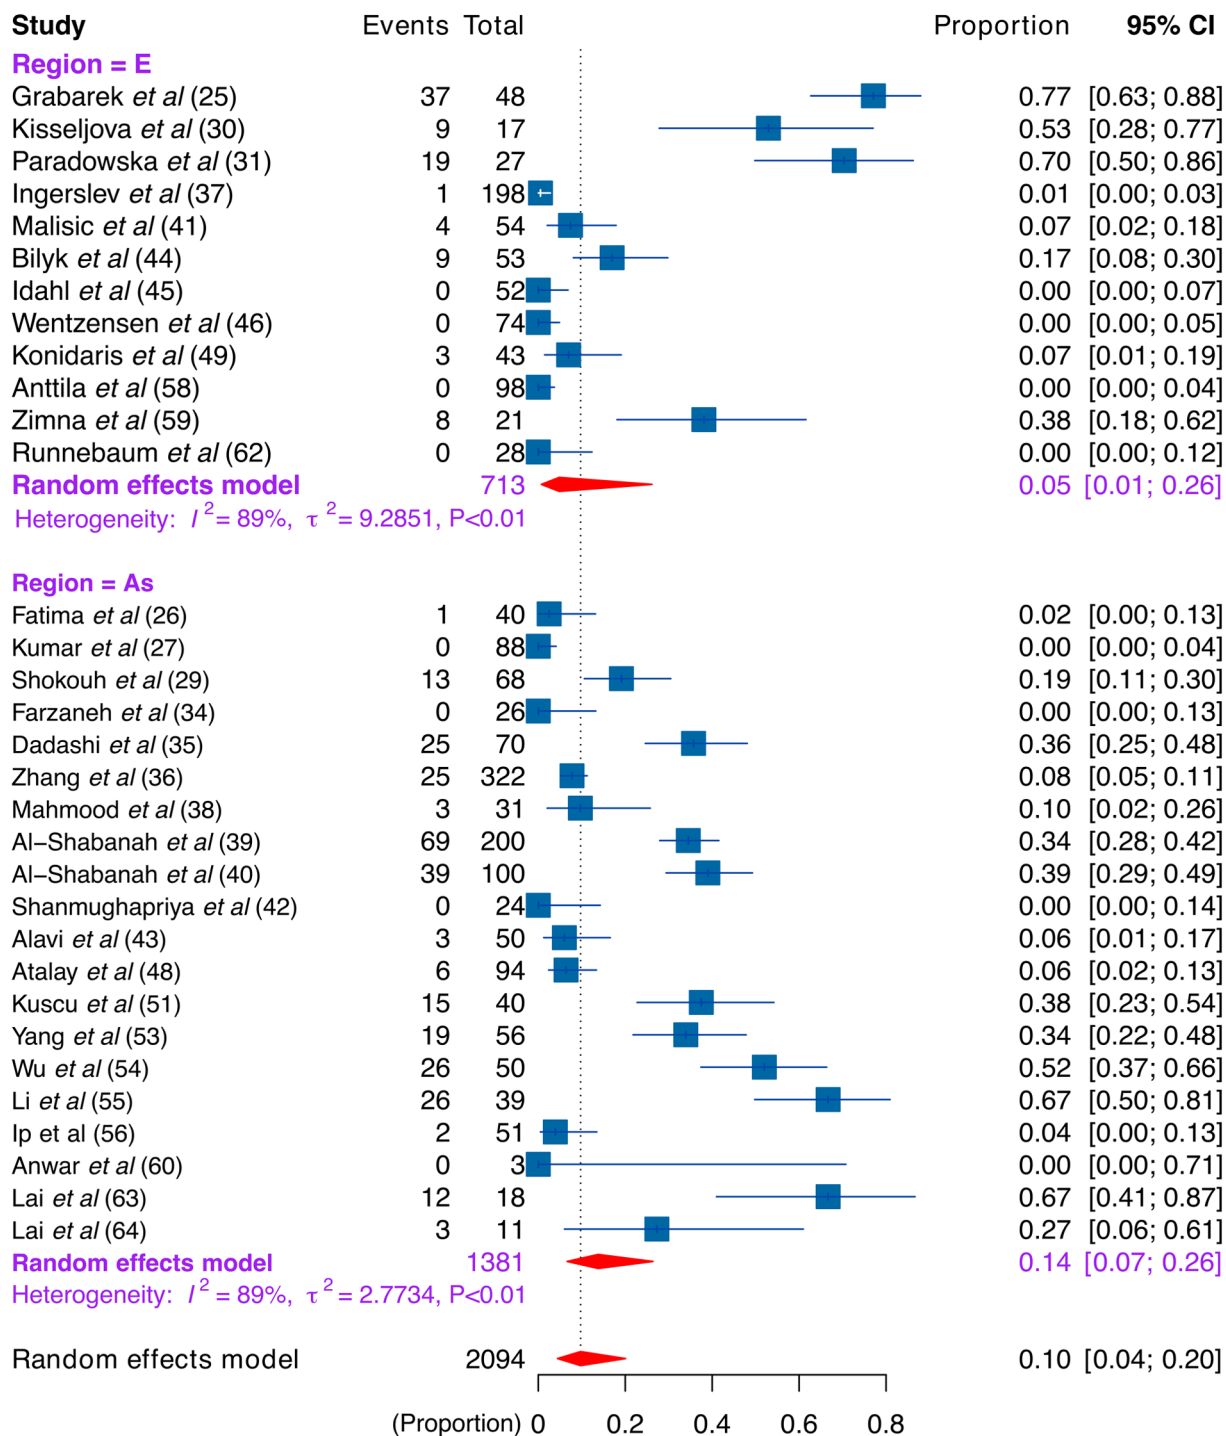

Heterogeneity:  $I^2 = 88\%$ ,  $\tau^2 = 4.8635$ ,  $P < 0.01$   
 Test for subgroup differences:  $\chi_1^2 = 1.14$ ,  $df = 1$  ( $P = 0.29$ )
