# Supplementary material for: Association of human papillomavirus 16 and 18 with ovarian cancer risk: Insights from a meta‑analysis
Source: PubMed Central journal article supplement — Oncol Lett. 2024 Sep 19;28(6):556. doi: 10.3892/ol.2024.14689 (PMC11443309; doi:10.3892/ol.2024.14689), 2024-09-19
Supplement: Supplementary_Data2.pdf [file Supplementary_Data2.pdf]

**Table SI.** Description of studies included in the meta-analysis.

| First author/s, year           | Country  | Method | Sample              | HPV genotype | Serous POS | Serous total | Case POS | Case total | Control POS | Control total | (Refs.) |
|--------------------------------|----------|--------|---------------------|--------------|------------|--------------|----------|------------|-------------|---------------|---------|
| Grabarek <i>et al</i> , 2023   | Poland   | PCR    | FFPE                | All          | -          | -            | 37       | 48         | 7           | 50            | (25)    |
|                                |          |        |                     | HPV 16/18    | -          | -            | 37       | 48         | 7           | 50            |         |
| Fatima <i>et al</i> , 2023     | Pakistan | PCR    | FFPE                | All          | 5          | 7            | 9        | 40         | -           | -             | (26)    |
|                                |          |        |                     | HPV 16/18    | 1          | 7            | 1        | 40         | -           | -             |         |
| Kumar <i>et al</i> , 2021      | India    | PCR    | Fresh tissue        | All          | 0          | 88           | 0        | 88         | -           | -             | (27)    |
|                                |          |        |                     | HPV 16/18    | 0          | 88           | 0        | 88         | -           | -             |         |
| Yang <i>et al</i> , 2020       | China    | PCR    | FFPE                | All          | -          | 208          | 78       | 310        | -           | -             | (28)    |
|                                |          |        |                     | HPV 16/18    | -          | -            | -        | -          | -           | -             |         |
| Shokouh <i>et al</i> , 2020    | Iran     | PCR    | FFPE                | All          | -          | 47           | 13       | 68         | 0           | 45            | (29)    |
|                                |          |        |                     | HPV 16/18    | -          | 47           | 13       | 68         | 0           | 45            |         |
| Kisseljova <i>et al</i> , 2020 | Russia   | PCR    | FFPE, frozen tissue | All          | 7          | 14           | 10       | 17         | -           | -             | (30)    |
|                                |          |        |                     | HPV 16/18    | 6          | 14           | 9        | 17         | -           | -             |         |
| Paradowska <i>et al</i> , 2019 | Poland   | PCR    | Frozen tissue       | All          | 14         | 20           | 20       | 27         | 2           | 8             | (31)    |
|                                |          |        |                     | HPV 16/18    | 14         | 20           | 19       | 27         | 2           | 8             |         |
| Hammou <i>et al</i> , 2019     | Morocco  | PCR    | Fresh tissue        | All          | 6          | 53           | 8        | 70         | -           | -             | (32)    |
|                                |          |        |                     | HPV 16/18    | 6          | 53           | 7        | 70         | -           | -             |         |
| Hassan <i>et al</i> , 2017     | Egypt    | PCR    | FFPE                | All          | -          | -            | 10       | 100        | -           | -             | (33)    |
|                                |          |        |                     | HPV 16/18    | -          | -            | 9        | 100        | -           | -             |         |
| Farzaneh <i>et al</i> , 2017   | Iran     | PCR    | FFPE                | All          | -          | -            | 0        | 26         | 0           | 79            | (34)    |
|                                |          |        |                     | HPV 16/18    | -          | -            | 0        | 26         | 0           | 79            |         |
| Dadashi <i>et al</i> , 2017    | Iran     | PCR    | FFPE                | All          | -          | -            | 25       | 70         | 2           | 70            | (35)    |
|                                |          |        |                     | HPV16/18     | -          | -            | 25       | 70         | 2           | 70            |         |

|                                    |              |         |               |           |   |     |    |     |   |     |      |
|------------------------------------|--------------|---------|---------------|-----------|---|-----|----|-----|---|-----|------|
| Zhang <i>et al</i> , 2016          | China        | PCR     | FFPE          | All       | - | -   | 64 | 322 | 5 | 199 | (36) |
|                                    |              |         |               | HPV 16/18 | - | -   | 25 | 322 | 2 | 199 |      |
| Ingerslev <i>et al</i> , 2016      | Denmark      | PCR     | FFPE          | All       | 1 | 163 | 1  | 198 | - | -   | (37) |
|                                    |              |         |               | HPV 16/18 | 1 | 163 | 1  | 198 | - | -   |      |
| Mahmood <i>et al</i> , 2014        | Iraq         | IHC     | FFPE          | All       | 3 | 26  | 3  | 31  | 0 | 18  | (38) |
|                                    |              |         |               | HPV 16/18 | 3 | 26  | 3  | 31  | 0 | 18  |      |
| Al-Shabanah <i>et al</i> , 2014    | Saudi Arabia | PCR     | FFPE          | All       | - | -   | 72 | 200 | - | -   | (39) |
|                                    |              |         |               | HPV 16/18 | - | -   | 69 | 200 | - | -   |      |
| Al-Shabanah <i>et al</i> , 2013    | Saudi Arabia | PCR     | FFPE          | All       | - | -   | 42 | 100 | 8 | 100 | (40) |
|                                    |              |         |               | HPV 16/18 | - | -   | 39 | 100 | 0 | 100 |      |
| Malisic <i>et al</i> , 2012        | Serbia       | PCR     | Frozen tissue | All       | 2 | 35  | 4  | 54  | - | -   | (41) |
|                                    |              |         |               | HPV 16/18 | 2 | 35  | 4  | 54  | - | -   |      |
| Shanmughapriya <i>et al</i> , 2012 | India        | PCR     | Frozen tissue | All       | 3 | 12  | 6  | 24  | 0 | 9   | (42) |
|                                    |              |         |               | HPV 16/18 | 0 | 12  | 0  | 24  | 0 | 9   |      |
| Alavi <i>et al</i> , 2012          | Iran         | PCR     | FFPE          | All       | 2 | 43  | 3  | 50  | 1 | 30  | (43) |
|                                    |              |         |               | HPV 16/18 | 2 | 43  | 3  | 50  | 1 | 30  |      |
| Bilyk <i>et al</i> , 2011          | Ukraine      | PCR/IHC | FFPE          | All       | 9 | 53  | 9  | 53  | - | -   | (44) |
|                                    |              |         |               | HPV 16/18 | 9 | 53  | 9  | 53  | - | -   |      |
| Idahl <i>et al</i> , 2010          | Sweden       | PCR     | Frozen tissue | All       | 0 | 33  | 0  | 52  | 0 | 110 | (45) |
|                                    |              |         |               | HPV 16/18 | 0 | 33  | 0  | 52  | 0 | 110 |      |
| Wentzensen <i>et al</i> , 2008     | Germany      | PCR     | FFPE          | All       | 0 | 24  | 0  | 74  | - | -   | (46) |
|                                    |              |         |               | HPV 16/18 | 0 | 24  | 0  | 74  | - | -   |      |
| Giordano <i>et al</i> , 2008       | Italy        | PCR     | FFPE          | All       | 1 | 25  | 1  | 50  | - | -   | (47) |
|                                    |              |         |               | HPV 16/18 | - | -   | -  | -   | - | -   |      |
| Atalay <i>et al</i> , 2007         | Turkey       | PCR     | FFPE          | All       | 8 | 76  | 8  | 94  | - | -   | (48) |

|                               |         |                   |               |           |    |    |    |    |    |    |      |
|-------------------------------|---------|-------------------|---------------|-----------|----|----|----|----|----|----|------|
|                               |         |                   |               | HPV 16/18 | 6  | 76 | 6  | 94 | -  | -  |      |
| Konidaris <i>et al</i> , 2007 | Greece  | PCR               | FFPE          | All       | -  | -  | 12 | 43 | 38 | 84 | (49) |
|                               |         |                   |               | HPV 16/18 | -  | -  | 3  | 43 | 10 | 84 |      |
| Quirk <i>et al</i> , 2006     | US      | PCR               | Frozen tissue | All       | 0  | 13 | 0  | 17 | 0  | 3  | (50) |
|                               |         |                   |               | HPV 16/18 | 0  | 13 | 0  | 17 | 0  | 3  |      |
| Kuscu <i>et al</i> , 2005     | Turkey  | ISH               | FFPE          | All       | -  | -  | 15 | 40 | 9  | 32 | (51) |
|                               |         |                   |               | HPV 16/18 | -  | -  | 15 | 40 | 9  | 32 |      |
| Elishaev <i>et al</i> , 2005  | Canada  | ISH/PCR           | FFPE          | All       | -  | -  | 9  | 10 | 0  | 8  | (52) |
|                               |         |                   |               | HPV 16/18 | -  | -  | 8  | 10 | 0  | 8  |      |
| Yang <i>et al</i> , 2004      | China   | PCR               | Frozen tissue | All       | -  | -  | 19 | 56 | -  | -  | (53) |
|                               |         |                   |               | HPV 16/18 | -  | -  | 19 | 56 | -  | -  |      |
| Wu <i>et al</i> , 2003        | China   | ISH               | FFPE          | All       | 15 | 24 | 26 | 50 | 2  | 30 | (54) |
|                               |         |                   |               | HPV 16/18 | 15 | 24 | 26 | 50 | 2  | 30 |      |
| Li <i>et al</i> , 2002        | China   | PCR               | FFPE          | All       | -  | -  | 26 | 39 | 0  | 50 | (55) |
|                               |         |                   |               | HPV 16/18 | -  | -  | 26 | 39 | 0  | 50 |      |
| Ip <i>et al</i> , 2002        | China   | PCR/Southern blot | Fresh tissue  | All       | 0  | 15 | 2  | 51 | 0  | 5  | (56) |
|                               |         |                   |               | HPV 16/18 | 0  | 15 | 2  | 51 | 0  | 5  |      |
| Chen <i>et al</i> , 1999      | US      | PCR               | FFPE          | All       | -  | -  | 0  | 20 | -  | -  | (57) |
|                               |         |                   |               | HPV 16/18 | -  | -  | 0  | 20 | -  | -  |      |
| Anttila <i>et al</i> , 1999   | Finland | PCR               | FFPE          | All       | 0  | 31 | 0  | 98 | -  | -  | (58) |
|                               |         |                   |               | HPV 16/18 | 0  | 31 | 0  | 98 | -  | -  |      |
| Zimna <i>et al</i> , 1997     | Poland  | PCR/ISH           | Frozen tissue | All       | 1  | 6  | 8  | 21 | -  | -  | (59) |
|                               |         |                   |               | HPV 16/18 | 1  | 6  | 8  | 21 | -  | -  |      |
| Anwar <i>et al</i> , 1996     | Japan   | PCR               | FFPE          | All       | -  | -  | 0  | 3  | -  | -  | (60) |
|                               |         |                   |               | HPV 16/18 | -  | -  | 0  | 3  | -  | -  |      |

|                               |         |     |               |           |   |    |    |    |   |    |      |
|-------------------------------|---------|-----|---------------|-----------|---|----|----|----|---|----|------|
| Trottier <i>et al</i> , 1995  | Canada  | PCR | Fresh tissue  | All       | 0 | 1  | 0  | 23 | 0 | 17 | (61) |
|                               |         |     |               | HPV 16/18 | 0 | 1  | 0  | 23 | 0 | 17 |      |
| Runnebaum <i>et al</i> , 1995 | Germany | PCR | FFPE          | All       | 0 | 21 | 0  | 28 | - | -  | (62) |
|                               |         |     |               | HPV 16/18 | 0 | 21 | 0  | 28 | - | -  |      |
| Lai <i>et al</i> , 1994       | China   | PCR | Frozen tissue | All       | 7 | 9  | 12 | 18 | - | -  | (63) |
|                               |         |     |               | HPV 16/18 | 7 | 9  | 12 | 18 | - | -  |      |
| Lai <i>et al</i> , 1992       | China   | PCR | FFPE          | All       | 2 | 8  | 3  | 11 | 5 | 10 | (64) |
|                               |         |     |               | HPV 16/18 | 2 | 8  | 3  | 11 | 5 | 10 |      |
| Beckmann <i>et al</i> , 1991  | US      | PCR | FFPE          | All       | 0 | 12 | 0  | 18 | - | -  | (65) |
|                               |         |     |               | HPV 16/18 | 0 | 12 | 0  | 18 | - | -  |      |
| McLellan <i>et al</i> , 1990  | US      | PCR | FFPE          | All       | - | -  | 0  | 24 | - | -  | (66) |
|                               |         |     |               | HPV 16/18 | - | -  | 0  | 24 | - | -  |      |
| Leake and Shah, 1989          | US      | PCR | Frozen tissue | All       | 0 | 4  | 0  | 18 | 0 | 7  | (67) |
|                               |         |     |               | HPV 16/18 | 0 | 4  | 0  | 18 | 0 | 7  |      |

FFPE, formalin-fixed paraffin-embedded; HPV, human papillomavirus; HPV 16/18, HPV 16 and/or 18; IHC, immunohistochemistry; ISH, *in situ* hybridization; POS, positive.

**Table SII.** Prevalence of HPV in the control group in selected studies.

| Variable          | No. of included studies | No. of patients |              | Pooled HPV prevalence       |                               | I <sup>2</sup> | P-value (Cochrane Q-test) |
|-------------------|-------------------------|-----------------|--------------|-----------------------------|-------------------------------|----------------|---------------------------|
|                   |                         | Summed events   | Summed total | Fixed effect model (95% CI) | Random effects model (95% CI) |                |                           |
| HPV all genotypes |                         |                 |              |                             |                               |                |                           |
| Asia              | 12                      | 32              | 627          | 0.05 (0.04-0.07)            | 0.03 (0.01-0.07)              | 71.3           | <0.0001                   |
| Non-Asia          | 7                       | 47              | 279          | 0.17 (0.13-0.22)            | 0.03 (0.01-0.32)              | 52.9           | <0.0001                   |
| Total             | 19                      | 79              | 906          | 0.09 (0.07-0.11)            | 0.03 (0.01-0.10)              | 79.1           | <0.0001                   |
| HPV 16/18         |                         |                 |              |                             |                               |                |                           |
| Asia              | 12                      | 21              | 627          | 0.03 (0.02-0.05)            | 0.01 (0.01-0.08)              | 70.7           | <0.0001                   |
| Non-Asia          | 7                       | 19              | 279          | 0.07 (0.04-0.10)            | 0.03 (0.01-0.20)              | 0.01           | <0.0001                   |
| Total             | 19                      | 40              | 906          | 0.04 (0.03-0.06)            | 0.02 (0.01-0.07)              | 53.4           | <0.0001                   |

HPV, human papillomavirus; HPV 16/18, HPV 16 and/or 18.

**Table SIII.** Linear regression test of asymmetry for proportional meta-analysis.

| <b>Variable</b>      | <b>Peter's test (P-value)</b> |
|----------------------|-------------------------------|
| Ovarian cancer group |                               |
| HPV (all genotypes)  |                               |
| All included studies | 0.06                          |
| Studies from Asia    | 0.28                          |
| Studies from Europe  | 0.29                          |
| Serous type          | 0.06                          |
| Non-serous type      | 0.34                          |
| HPV 16/18            |                               |
| All included studies | 0.05                          |
| Studies from Asia    | 0.27                          |
| Studies from Europe  | 0.36                          |
| Serous type          | 0.12                          |
| Non-serous type      | 0.51                          |
| Control group        |                               |
| HPV (all genotypes)  |                               |
| All included studies | 0.58                          |
| Studies from Asia    | 0.04                          |

|                      |      |
|----------------------|------|
| HPV 16/18            |      |
| All included studies | 0.10 |
| Studies from Asia    | 0.10 |

HPV, human papillomavirus; HPV 16/18, HPV 16 and/or 18.

**Table SIV.** Linear regression test of asymmetry for comparative meta-analysis (case-control analysis).

| <b>Variable</b>      | <b>P-value</b> |             |
|----------------------|----------------|-------------|
|                      | <b>Egger</b>   | <b>Begg</b> |
| HPV (all genotypes)  |                |             |
| All included studies | 0.73           | 0.35        |
| Studies from Asia    | 0.57           | 0.19        |
| HPV 16/18            |                |             |
| All included studies | 0.87           | 0.71        |
| Studies from Asia    | 0.56           | 0.93        |

HPV, human papillomavirus; HPV 16/18, HPV 16 and/or 18.
